# Supplementary material for: Dual metformin and glucagon-like peptide-1 receptor agonist therapy reduces mortality and hepatic complications in cirrhotic patients with diabetes mellitus
Source: PubMed Central journal article supplement — Ann Gastroenterol. 2023 Jul 3;36(5):555–63. doi: 10.20524/aog.2023.0814 (PMC10433257; doi:10.20524/aog.2023.0814), 2023-07-03
Supplement: AnnGastroenterol-36-555_Suppl1.pdf [file AnnGastroenterol-36-555_Suppl1.pdf]

## Supplementary material

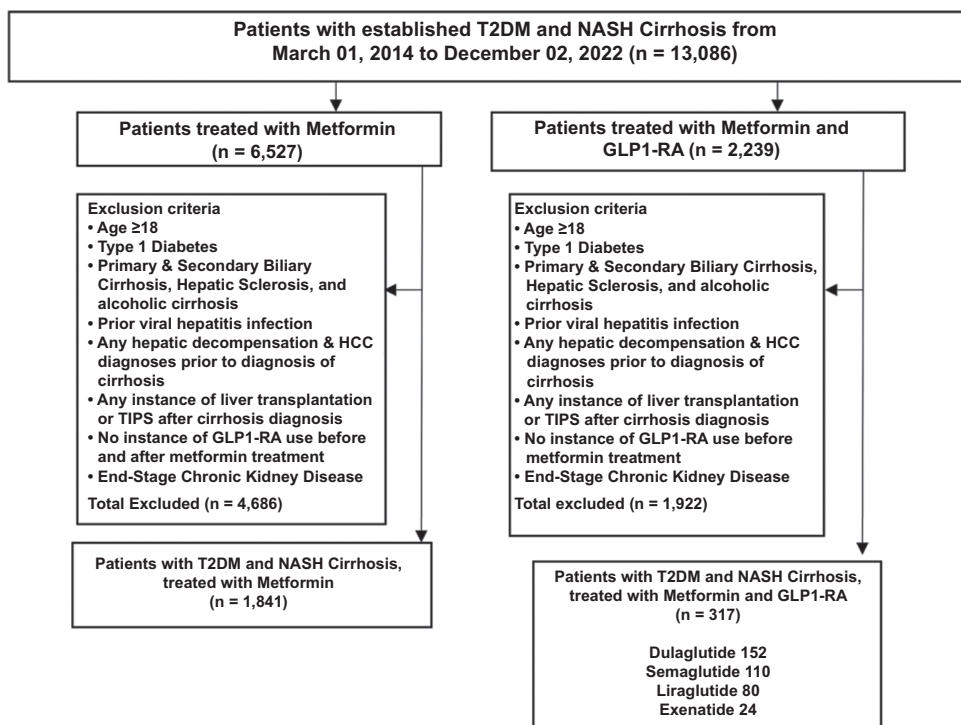

**Supplementary Figure 1** Cohort construction for T2DM patients with NASH cirrhosis Cohort Construction. Inclusion and exclusion criteria for patient cohort selection was based on ICD-10 coding, Current Procedural Terminology, and RxNorm terminology. For details review materials and methods

T2DM, type 2 diabetes mellitus; GLP1-RA, glucagon-like peptide-1 receptor agonist; NASH, nonalcoholic steatohepatitis

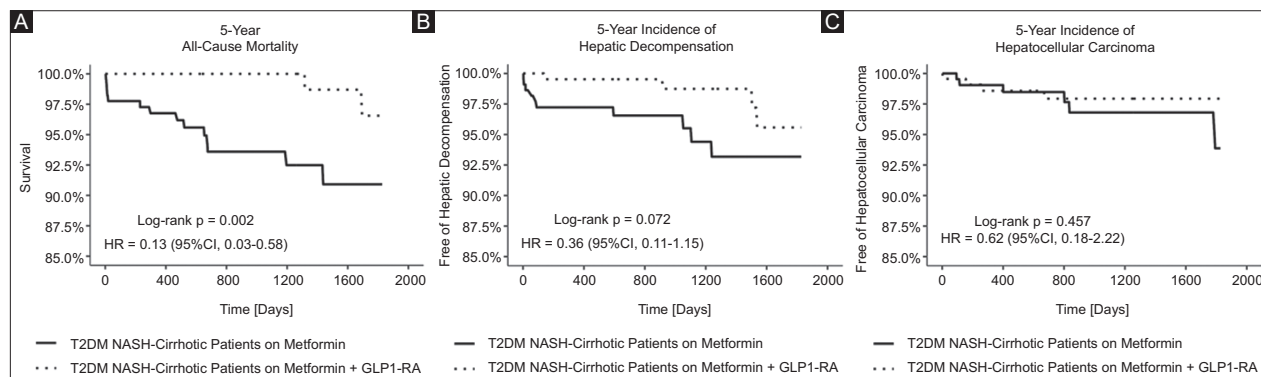

**Supplementary Figure 2** Five-year all-cause mortality, composite hepatic decompensation, and hepatocellular carcinoma for T2DM patients with NASH cirrhosis Five-year outcomes for T2DM patients with NASH cirrhosis on metformin vs. metformin and GLP1-RA therapy. Kaplan-Meier probability values are percent free of death (A), composite hepatic decompensation (B) and hepatocellular carcinoma (C). P values indicate P log-rank test

T2DM, type 2 diabetes mellitus; NASH, nonalcoholic steatohepatitis; GLP1-RA, glucagon-like peptide-1 receptor; HR, hazard ratio; CI, confidence interval

**Supplementary Table 1** Complete baseline characteristics before and after propensity score matching for T2DM cirrhosis patients

| Characteristic ID | Characteristic name                                                                  | Before propensity score matching |                     |         | After propensity score matching |                     |         |
|-------------------|--------------------------------------------------------------------------------------|----------------------------------|---------------------|---------|---------------------------------|---------------------|---------|
|                   |                                                                                      | Metformin                        | Metformin + GLP1-RA | P-value | Metformin                       | Metformin + GLP1-RA | P-value |
| Age               | Current Age                                                                          | 62.44±14.34                      | 58.41±12.76         | <0.001  | 58.69±14.99                     | 58.53±12.84         | 0.770   |
| AI                | Age at Index                                                                         | 58.04±14.23                      | 56.23±12.76         | <0.001  | 56.39±14.92                     | 56.24±12.85         | 0.778   |
| F                 | Female                                                                               | 10093 (50.33)                    | 889 (62.52)         | 0.001   | 804 (61.09)                     | 805 (61.17)         | 0.968   |
| M                 | Male                                                                                 | 9959 (49.66)                     | 533 (37.48)         | <0.001  | 512 (38.91)                     | 511 (38.83)         | 0.968   |
| UN                | Unknown Gender                                                                       | 10 (0.05)                        | 0 (0)               | 0.400   | 0 (0)                           | 0 (0)               | NA      |
| 2106-3            | White                                                                                | 13315 (66.4)                     | 1007 (70.82)        | <0.001  | 943 (71.66)                     | 934 (70.97)         | 0.698   |
| 1002-5            | American Indian or Alaska Native                                                     | 202 (1.01)                       | 11 (0.77)           | 0.390   | 11 (0.84)                       | 11 (0.84)           | >0.99   |
| 2028-9            | Asian                                                                                | 571 (2.85)                       | 30 (2.11)           | 0.103   | 30 (2.28)                       | 29 (2.2)            | 0.895   |
| 2054-5            | Black or African American                                                            | 2960 (14.76)                     | 205 (14.42)         | 0.723   | 163 (12.39)                     | 181 (13.75)         | 0.298   |
| 2076-8            | Native Hawaiian or Other Pacific Islander                                            | 25 (0.12)                        | 10 (0.7)            | <0.001  | 10 (0.76)                       | 10 (0.76)           | >0.99   |
| 2131-1            | Unknown Race                                                                         | 2980 (14.86)                     | 168 (11.81)         | <0.001  | 168 (12.77)                     | 160 (12.16)         | 0.637   |
| 2135-2            | Hispanic or Latino                                                                   | 2096 (10.45)                     | 157 (11.04)         | 0.484   | 132 (10.03)                     | 149 (11.32)         | 0.283   |
| 2186-5            | Not Hispanic or Latino                                                               | 13202 (65.84)                    | 1009 (70.96)        | <0.001  | 944 (71.73)                     | 929 (70.59)         | 0.519   |
| UN                | Unknown Ethnicity                                                                    | 4755 (23.71)                     | 256 (18)            | <0.001  | 240 (18.24)                     | 238 (18.09)         | 0.919   |
| N17-N19           | Acute kidney failure and chronic kidney disease                                      | 2242 (11.18)                     | 313 (22.01)         | <0.001  | 280 (21.28)                     | 272 (20.67)         | 0.702   |
| F50-F59           | Behavioral syndromes associated with physiological disturbances and physical factors | 654 (3.26)                       | 143 (10.06)         | <0.001  | 101 (7.68)                      | 113 (8.59)          | 0.392   |
| K00-K95           | Diseases of the digestive system                                                     | 12223 (60.95)                    | 1224 (86.08)        | <0.001  | 1088 (82.67)                    | 1120 (85.11)        | 0.090   |
| E00-E89           | Endocrine, nutritional and metabolic diseases                                        | 15091 (75.26)                    | 1320 (92.83)        | <0.001  | 1176 (89.36)                    | 1214 (92.25)        | 0.010   |
| I50               | Heart failure                                                                        | 1824 (9.1)                       | 174 (12.24)         | <0.001  | 149 (11.32)                     | 165 (12.54)         | 0.336   |
| I10-I16           | Hypertensive diseases                                                                | 10834 (54.03)                    | 1054 (74.12)        | <0.001  | 927 (70.44)                     | 956 (72.64)         | 0.210   |
| I20-I25           | Ischemic heart diseases                                                              | 3231 (16.11)                     | 361 (25.39)         | <0.001  | 327 (24.85)                     | 336 (25.53)         | 0.686   |
| F10-F19           | Mental and behavioral disorders due to psychoactive substance use                    | 5044 (25.15)                     | 471 (33.12)         | <0.001  | 423 (32.14)                     | 434 (32.98)         | 0.647   |
| E70-E88           | Metabolic disorders                                                                  | 9761 (48.68)                     | 1083 (76.16)        | <0.001  | 948 (72.04)                     | 980 (74.47)         | 0.159   |
| E13               | Other specified diabetes mellitus                                                    | 385 (1.92)                       | 83 (5.84)           | <0.001  | 72 (5.47)                       | 65 (4.94)           | 0.539   |
| E65-E68           | Overweight, obesity and other hyperalimentation                                      | 5755 (28.7)                      | 883 (62.1)          | <0.001  | 763 (57.98)                     | 781 (59.35)         | 0.476   |
| K76.0             | Fatty (change of) liver, not elsewhere classified                                    | 4937 (24.62)                     | 782 (54.97)         | <0.001  | 697 (52.95)                     | 663 (50.36)         | 0.172   |
| K75.8             | Other specified inflammatory liver diseases                                          | 1717 (8.56)                      | 437 (30.75)         | <0.001  | 338 (25.72)                     | 330 (25.07)         | 0.695   |
| K70.3             | Alcoholic cirrhosis of liver                                                         | 1099 (5.48)                      | 73 (5.16)           | 0.583   | 60 (4.54)                       | 69 (5.26)           | 0.379   |
| B18.2             | Chronic viral hepatitis C                                                            | 2805 (13.99)                     | 163 (11.43)         | <0.01   | 154 (11.67)                     | 152 (11.53)         | 0.906   |

(Contd...)

Supplementary Table 1 (Continued)

| Characteristic ID | Characteristic name                           | Before propensity score matching |                     |         | After propensity score matching |                     |         |
|-------------------|-----------------------------------------------|----------------------------------|---------------------|---------|---------------------------------|---------------------|---------|
|                   |                                               | Metformin                        | Metformin + GLP1-RA | P-value | Metformin                       | Metformin + GLP1-RA | P-value |
| B18.1             | Chronic viral hepatitis B without delta-agent | 461 (2.3)                        | 28 (1.99)           | 0.420   | 25 (1.87)                       | 27 (2.02)           | 0.783   |
| B18.0             | Chronic viral hepatitis B with delta-agent    | 22 (0.11)                        | 9 (0.62)            | <0.001  | 9 (0.72)                        | 0 (0)               | <0.01   |
| K74.6             | Other and unspecified cirrhosis of liver      | 5103 (25.45)                     | 718 (50.5)          | <0.001  | 574 (43.59)                     | 590 (44.81)         | 0.516   |
| K75.4             | Autoimmune hepatitis                          | 176 (0.88)                       | 21 (1.49)           | 0.014   | 27 (2.02)                       | 19 (1.44)           | 0.244   |
| E83.11            | Hemochromatosis                               | 199 (0.99)                       | 21 (1.49)           | 0.054   | 17 (1.3)                        | 19 (1.44)           | 0.744   |
| E88.01            | Alpha-1-antitrypsin deficiency                | 32 (0.16)                        | 10 (0.62)           | <0.001  | 9 (0.72)                        | 9 (0.72)            | >0.99   |
| 1003143           | Surgery                                       | 10719 (53.45)                    | 1083 (76.16)        | <0.001  | 954 (72.49)                     | 984 (74.77)         | 0.184   |
| 1006964           | Surgical Procedures on the Digestive System   | 3656 (18.23)                     | 502 (35.3)          | <0.001  | 430 (32.67)                     | 437 (33.21)         | 0.772   |
| CV800             | Ace inhibitors                                | 5339 (26.62)                     | 655 (46.06)         | <0.001  | 576 (43.77)                     | 583 (44.3)          | 0.783   |
| CV805             | Angiotensin ii inhibitor                      | 2554 (12.74)                     | 383 (26.93)         | <0.001  | 325 (24.7)                      | 324 (24.62)         | 0.964   |
| CV300             | Antiarrhythmics                               | 5619 (28.02)                     | 749 (52.67)         | <0.001  | 668 (50.76)                     | 667 (50.68)         | 0.969   |
| BL110             | Anticoagulants                                | 5000 (24.93)                     | 560 (39.38)         | <0.001  | 516 (39.21)                     | 513 (38.98)         | 0.905   |
| CV490             | Antihypertensives, other                      | 2550 (12.72)                     | 328 (23.07)         | <0.001  | 297 (22.57)                     | 304 (23.1)          | 0.745   |
| HS503             | Antihypoglycemics                             | 3857 (19.23)                     | 510 (35.87)         | <0.001  | 459 (34.88)                     | 450 (34.2)          | 0.712   |
| CV350             | Antilipemic agents                            | 6533 (32.58)                     | 853 (59.99)         | <0.001  | 779 (59.2)                      | 761 (57.83)         | 0.476   |
| CV100             | Beta blockers/related                         | 5998 (29.91)                     | 668 (46.98)         | <0.001  | 603 (45.82)                     | 604 (45.9)          | 0.969   |
| CV200             | Calcium channel blockers                      | 3886 (19.38)                     | 453 (31.86)         | <0.001  | 392 (29.79)                     | 403 (30.62)         | 0.641   |
| CV700             | Diuretics                                     | 6416 (32)                        | 741 (52.11)         | <0.001  | 641 (48.71)                     | 664 (50.46)         | 0.370   |
| BL117             | Platelet aggregation inhibitors               | 5268 (26.27)                     | 637 (44.8)          | <0.001  | 559 (42.48)                     | 573 (43.54)         | 0.582   |
| HS509             | Hypoglycemic agents, other                    | 10 (0.05)                        | 10 (0.7)            | <0.001  | 10 (0.76)                       | 10 (0.76)           | >0.99   |
| HS501             | Insulin                                       | 5372 (26.79)                     | 777 (54.64)         | <0.001  | 712 (54.1)                      | 681 (51.75)         | 0.226   |
| 16681             | a-carbose                                     | 49 (0.23)                        | 10 (0.66)           | <0.01   | 10 (0.84)                       | 10 (0.84)           | >0.99   |
| 30009             | Miglitol                                      | 10 (0.05)                        | 0 (0)               | 0.395   | 0 (0)                           | 0 (0)               | -       |
| 593411            | Sitagliptin                                   | 1749 (8.31)                      | 285 (18.71)         | <0.001  | 217 (18.3)                      | 204 (17.2)          | 0.485   |
| 1100699           | Linagliptin                                   | 441 (2.1)                        | 71 (4.66)           | <0.001  | 59 (4.98)                       | 50 (4.22)           | 0.377   |
| 1368001           | Alogliptin                                    | 81 (0.38)                        | 21 (1.38)           | <0.001  | 16 (1.35)                       | 13 (1.1)            | 0.575   |
| 857974            | Saxagliptin                                   | 150 (0.71)                       | 20 (1.31)           | <0.01   | 21 (1.77)                       | 16 (1.35)           | 0.407   |
| 73044             | Repaglinide                                   | 100 (0.48)                       | 15 (0.98)           | <0.01   | 15 (1.26)                       | 10 (0.84)           | 0.315   |
| 274332            | Nateglinide                                   | 29 (0.14)                        | 10 (0.66)           | <0.001  | 10 (0.84)                       | 10 (0.84)           | >0.99   |
| 1545653           | Empagliflozin                                 | 559 (2.66)                       | 177 (11.62)         | <0.001  | 132 (11.13)                     | 114 (9.61)          | 0.225   |
| 1373458           | Canagliflozin                                 | 279 (1.33)                       | 77 (5.06)           | <0.001  | 60 (5.06)                       | 48 (4.05)           | 0.237   |
| 1488564           | Dapagliflozin                                 | 265 (1.26)                       | 70 (4.6)            | <0.001  | 48 (4.05)                       | 45 (3.79)           | 0.751   |
| 1992672           | Ertugliflozin                                 | 24 (0.11)                        | 10 (0.66)           | <0.001  | 12 (1.01)                       | 10 (0.84)           | 0.668   |
| 4821              | Glipizide                                     | 2471 (11.74)                     | 328 (21.54)         | <0.001  | 270 (22.77)                     | 249 (21)            | 0.297   |
| 25789             | Glimepiride                                   | 1360 (6.46)                      | 165 (10.83)         | <0.001  | 127 (10.71)                     | 120 (10.12)         | 0.638   |
| 4815              | Glyburide                                     | 684 (3.25)                       | 71 (4.66)           | <0.01   | 44 (3.71)                       | 54 (4.55)           | 0.302   |

(Contd...)

**Supplementary Table 1** (Continued)

| Characteristic ID | Characteristic name                                                            | Before propensity score matching |                     |         | After propensity score matching |                     |         |
|-------------------|--------------------------------------------------------------------------------|----------------------------------|---------------------|---------|---------------------------------|---------------------|---------|
|                   |                                                                                | Metformin                        | Metformin + GLP1-RA | P-value | Metformin                       | Metformin + GLP1-RA | P-value |
| 10633             | Tolazamide                                                                     | 10 (0.05)                        | 0 (0)               | 0.395   | 0 (0)                           | 0 (0)               | -       |
| 2404              | Chlorpropamide                                                                 | 10 (0.05)                        | 0 (0)               | 0.395   | 0 (0)                           | 0 (0)               | -       |
| 10635             | Tolbutamide                                                                    | 10 (0.05)                        | 0 (0)               | 0.395   | 0 (0)                           | 0 (0)               | -       |
| 33738             | Pioglitazone                                                                   | 625 (2.97)                       | 114 (7.48)          | <0.001  | 78 (6.58)                       | 80 (6.74)           | 0.869   |
| 84108             | Rosiglitazone                                                                  | 39 (0.18)                        | 10 (0.66)           | <0.001  | 10 (0.84)                       | 10 (0.84)           | >0.99   |
| 9044              | Alanine aminotransferase [Enzymatic activity/volume] in Serum, Plasma or Blood | 47.68 ± 71.81                    | 44.84 ± 56.96       | 0.207   | 46.96 ± 97.39                   | 45.39 ± 58.9        | 0.664   |
| 9045              | Albumin [Mass/volume] in Serum, Plasma or Blood                                | 3.86 ± 0.62                      | 3.98 ± 0.52         | <0.001  | 3.9 ± 0.62                      | 3.98 ± 0.53         | <0.01   |
| 9046              | Alkaline phosphatase [Enzymatic activity/volume] in Serum, Plasma or Blood     | 101.36 ± 71.93                   | 99.29 ± 60.36       | 0.362   | 103.06 ± 76.28                  | 99.63 ± 62.15       | 0.277   |
| 16362-6           | Ammonia [Moles/volume] in Plasma                                               | 131.34 ± 2036.12                 | 37.76 ± 25.49       | 0.727   | 42.66 ± 28.43                   | 37.71 ± 25.89       | 0.344   |
| 9047              | Aspartate aminotransferase [Enzymatic activity/volume] in Serum or Plasma      | 45.04 ± 68.15                    | 40.49 ± 54.79       | 0.034   | 40.71 ± 42.34                   | 40.86 ± 56.83       | 0.948   |
| 9048              | Bilirubin. direct [Mass/volume] in Serum or Plasma                             | 0.39 ± 1.19                      | 0.3 ± 1.11          | 0.070   | 0.37 ± 1.19                     | 0.31 ± 1.17         | 0.387   |
| 9049              | Bilirubin. indirect [Mass/volume] in Serum or Plasma                           | 0.65 ± 0.83                      | 0.61 ± 0.92         | 0.612   | 0.62 ± 0.79                     | 0.55 ± 0.55         | 0.409   |
| 9050              | Bilirubin. total [Mass/volume] in Serum, Plasma or Blood                       | 0.77 ± 1.18                      | 0.65 ± 1.01         | <0.001  | 0.71 ± 1                        | 0.66 ± 1.06         | 0.330   |
| 9083              | BMI                                                                            | 33.12 ± 7.28                     | 36.38 ± 7.04        | <0.001  | 34.86 ± 7.59                    | 36.36 ± 7.09        | <0.001  |
| 9081              | Body weight                                                                    | 207.26 ± 57.75                   | 227.02 ± 62.27      | <0.001  | 215.77 ± 59.45                  | 226.93 ± 62.73      | <0.001  |
| 9022              | Calcium [Mass/volume] in Serum, Plasma or Blood                                | 9.17 ± 0.77                      | 9.35 ± 0.63         | <0.001  | 9.17 ± 0.79                     | 9.35 ± 0.64         | <0.001  |
| 9024              | Creatinine [Mass/volume] in Serum, Plasma or Blood                             | 0.88 ± 2.05                      | 0.88 ± 0.41         | 0.983   | 0.83 ± 0.41                     | 0.88 ± 0.42         | <0.01   |
| 9051              | Gamma glutamyl transferase [Enzymatic activity/volume] in Serum or Plasma      | 151.17 ± 266.53                  | 155.2 ± 285.52      | 0.823   | 143.36 ± 233.63                 | 158.06 ± 299.43     | 0.576   |
| 9025              | Glucose [Mass/volume] in Serum, Plasma or Blood                                | 153.86 ± 78.54                   | 177.88 ± 81.11      | <0.001  | 154.12 ± 78.41                  | 178.24 ± 82.08      | <0.001  |
| 9037              | Hemoglobin A1c/ Hemoglobin.total in Blood                                      | 7.24 ± 1.93                      | 8.16 ± 2.12         | <0.001  | 7.21 ± 1.98                     | 8.16 ± 2.15         | <0.001  |
| 9032              | INR in Plasma or Blood                                                         | 1.22 ± 0.98                      | 1.15 ± 0.64         | 0.052   | 1.19 ± 0.91                     | 1.15 ± 0.66         | 0.331   |
| 9020              | Platelets [# /volume] in Blood                                                 | 210.97 ± 92.08                   | 221.22 ± 86.43      | <0.001  | 215.12 ± 89.75                  | 219.34 ± 86.01      | 0.282   |
| 9030              | Urea nitrogen [Mass/volume] in Serum, Plasma or Blood                          | 14.94 ± 7.97                     | 15.59 ± 7.48        | 0.010   | 15.4 ± 7.89                     | 15.5 ± 7.5          | 0.768   |

Characteristics ID defines baseline characteristics based on ICD-10 for diagnoses, RxNorm for medications, and CPT for procedures

BMI, body mass index; ALT, alanine aminotransferase; AST, aspartate aminotransferase; FIB-4, fibrosis-4; GLP1-RA, glucagon-like peptide-1 receptor agonist; INR, international normalized ratio; HbA1c, hemoglobin A1c; MELD-Na, model for end-stage liver disease; NASH, nonalcoholic steatohepatitis; T2DM, type 2 diabetes mellitus

**Supplementary Table 2** Patient cohort count

| Patient Count        | Before Propensity Score Matching |                     | After Propensity Score Matching |                     |
|----------------------|----------------------------------|---------------------|---------------------------------|---------------------|
|                      | Metformin                        | Metformin + GLP1-RA | Metformin                       | Metformin + GLP1-RA |
| All                  | 20053                            | 1422                | 1316                            | 1316                |
| Demographic Subgroup |                                  |                     |                                 |                     |
| Men                  | 9959                             | 533                 | 397                             | 397                 |
| Women                | 10093                            | 889                 | 774                             | 774                 |
| White                | 13315                            | 1007                | 737                             | 737                 |
| Non-White            | 3585                             | 233                 | 192                             | 192                 |
| Hispanic             | 2096                             | 157                 | 132                             | 132                 |
| Non-Hispanic         | 13202                            | 1009                | 857                             | 857                 |
| Age 35-59            | 5742                             | 564                 | 491                             | 491                 |
| Age 60-85            | 12429                            | 715                 | 644                             | 644                 |
| NASH                 | 1841                             | 317                 | 229                             | 229                 |

Patient cohort count was reported before and after propensity score matching

GLP1-RA, *glucagon-like peptide-1 receptor agonist*; NASH, *nonalcoholic steatohepatitis*

**Supplementary Table 3** Full before and after propensity score-matched baseline characteristics for T2DM patients with NASH cirrhosis

| Characteristic ID | Characteristic Name                                                                  | Before Propensity Score Matching |                     |         | After Propensity Score Matching |                     |         |
|-------------------|--------------------------------------------------------------------------------------|----------------------------------|---------------------|---------|---------------------------------|---------------------|---------|
|                   |                                                                                      | Metformin                        | Metformin + GLP1-RA | P-value | Metformin                       | Metformin + GLP1-RA | P-value |
| Age               | Current Age                                                                          | 61.63±13.03                      | 57.74±11.32         | <0.001  | 57.95±15.12                     | 57.83±11.53         | 0.923   |
| AI                | Age at Index                                                                         | 58.49±12.92                      | 54.61±11.17         | <0.001  | 54.35±14.99                     | 54.27±11.36         | 0.950   |
| F                 | Female                                                                               | 1182 (64.2)                      | 214 (67.51)         | 0.256   | 148 (64.63)                     | 154 (67.25)         | 0.554   |
| M                 | Male                                                                                 | 659 (35.8)                       | 103 (32.49)         | 0.256   | 81 (35.37)                      | 75 (32.75)          | 0.554   |
| UN                | Unknown Gender                                                                       | 0 (0)                            | 0 (0)               | -       | 0 (0)                           | 0 (0)               | -       |
| 2106-3            | White                                                                                | 1449 (78.71)                     | 253 (79.81)         | 0.657   | 183 (79.91)                     | 185 (80.79)         | 0.814   |
| 1002-5            | American Indian or Alaska Native                                                     | 10 (0.54)                        | 10 (3.16)           | <0.001  | 10 (4.37)                       | 10 (4.37)           | >0.99   |
| 2028-9            | Asian                                                                                | 43 (2.34)                        | 10 (3.16)           | 0.384   | 10 (4.37)                       | 10 (4.37)           | >0.99   |
| 2054-5            | Black or African American                                                            | 99 (5.38)                        | 18 (5.68)           | 0.827   | 12 (5.24)                       | 13 (5.68)           | 0.837   |
| 2076-8            | Native Hawaiian or Other Pacific Islander                                            | 10 (0.54)                        | 0 (0)               | 0.188   | 0 (0)                           | 0 (0)               | -       |
| 2131-1            | Unknown Race                                                                         | 236 (12.82)                      | 37 (11.67)          | 0.570   | 28 (12.23)                      | 24 (10.48)          | 0.556   |
| 2135-2            | Hispanic or Latino                                                                   | 207 (11.24)                      | 29 (9.15)           | 0.269   | 26 (11.35)                      | 20 (8.73)           | 0.351   |
| 2186-5            | Not Hispanic or Latino                                                               | 1318 (71.59)                     | 229 (72.24)         | 0.813   | 172 (75.11)                     | 166 (72.49)         | 0.524   |
| UN                | Unknown Ethnicity                                                                    | 316 (17.17)                      | 59 (18.61)          | 0.530   | 31 (13.54)                      | 43 (18.78)          | 0.128   |
| N17-N19           | Acute kidney failure and chronic kidney disease                                      | 232 (12.6)                       | 37 (11.67)          | 0.643   | 29 (12.66)                      | 26 (11.35)          | 0.666   |
| F50-F59           | Behavioral syndromes associated with physiological disturbances and physical factors | 150 (8.15)                       | 27 (8.52)           | 0.825   | 18 (7.86)                       | 18 (7.86)           | >0.99   |
| K00-K95           | Diseases of the digestive system                                                     | 1698 (92.23)                     | 304 (95.9)          | 0.020   | 215 (93.89)                     | 216 (94.32)         | 0.843   |
| E00-E89           | Endocrine, nutritional and metabolic diseases                                        | 1731 (94.03)                     | 308 (97.16)         | 0.024   | 220 (96.07)                     | 220 (96.07)         | >0.99   |
| I50               | Heart failure                                                                        | 177 (9.61)                       | 26 (8.2)            | 0.426   | 21 (9.17)                       | 17 (7.42)           | 0.498   |
| I10-I16           | Hypertensive diseases                                                                | 1363 (74.04)                     | 230 (72.56)         | 0.580   | 157 (68.56)                     | 164 (71.62)         | 0.475   |
| I20-I25           | Ischemic heart diseases                                                              | 398 (21.62)                      | 65 (20.51)          | 0.655   | 50 (21.83)                      | 45 (19.65)          | 0.564   |

(Contd...)

**Supplementary Table 3 (Continued)**

| Characteristic ID | Characteristic Name                                               | Before Propensity Score Matching |                     |         | After Propensity Score Matching |                     |         |
|-------------------|-------------------------------------------------------------------|----------------------------------|---------------------|---------|---------------------------------|---------------------|---------|
|                   |                                                                   | Metformin                        | Metformin + GLP1-RA | P-value | Metformin                       | Metformin + GLP1-RA | P-value |
| F10-F19           | Mental and behavioral disorders due to psychoactive substance use | 345 (18.74)                      | 60 (18.93)          | 0.937   | 37 (16.16)                      | 45 (19.65)          | 0.330   |
| E70-E88           | Metabolic disorders                                               | 1422 (77.24)                     | 250 (78.86)         | 0.523   | 166 (72.49)                     | 171 (74.67)         | 0.596   |
| E13               | Other specified diabetes mellitus                                 | 62 (3.37)                        | 14 (4.42)           | 0.349   | 10 (4.37)                       | 10 (4.37)           | >0.99   |
| E65-E68           | Overweight, obesity and other hyperalimentionation                | 1114 (60.51)                     | 216 (68.14)         | <0.01   | 139 (60.7)                      | 150 (65.5)          | 0.287   |
| 1003143           | Surgery                                                           | 1397 (75.88)                     | 251 (79.18)         | 0.202   | 179 (78.17)                     | 173 (75.55)         | 0.506   |
| 1006964           | Surgical Procedures on the Digestive System                       | 810 (44)                         | 130 (41.01)         | 0.322   | 95 (41.49)                      | 94 (41.05)          | 0.924   |
| CV800             | Ace inhibitors                                                    | 726 (39.44)                      | 138 (43.53)         | 0.169   | 79 (34.5)                       | 91 (39.74)          | 0.246   |
| CV805             | Angiotensin ii inhibitor                                          | 500 (27.16)                      | 91 (28.71)          | 0.568   | 60 (26.2)                       | 63 (27.51)          | 0.752   |
| CV300             | Antiarrhythmics                                                   | 873 (47.42)                      | 157 (49.53)         | 0.488   | 106 (46.29)                     | 106 (46.29)         | >0.99   |
| BL110             | Anticoagulants                                                    | 629 (34.17)                      | 109 (34.39)         | 0.940   | 82 (35.81)                      | 75 (32.75)          | 0.491   |
| CV490             | Antihypertensives, other                                          | 300 (16.3)                       | 59 (18.61)          | 0.306   | 39 (17.03)                      | 38 (16.59)          | 0.901   |
| HS503             | Antihypoglycemics                                                 | 472 (25.64)                      | 90 (28.39)          | 0.302   | 59 (25.76)                      | 59 (25.76)          | >0.99   |
| CV350             | Antilipemic agents                                                | 1108 (60.19)                     | 216 (68.14)         | <0.01   | 151 (65.94)                     | 150 (65.5)          | 0.922   |
| CV100             | Beta blockers/related                                             | 811 (44.05)                      | 135 (42.59)         | 0.627   | 94 (41.05)                      | 90 (39.3)           | 0.703   |
| CV200             | Calcium channel blockers                                          | 491 (26.67)                      | 87 (27.45)          | 0.774   | 55 (24.02)                      | 61 (26.64)          | 0.519   |
| CV700             | Diuretics                                                         | 856 (46.5)                       | 157 (49.53)         | 0.318   | 98 (42.8)                       | 104 (45.42)         | 0.572   |
| BL117             | Platelet aggregation inhibitors                                   | 765 (41.55)                      | 141 (44.48)         | 0.330   | 101 (44.11)                     | 101 (44.11)         | >0.99   |
| HS509             | Hypoglycemic agents, other                                        | 0 (0)                            | 88 (27.76)          | <0.001  | 0 (0)                           | 0 (0)               | -       |
| HS501             | Insulin                                                           | 627 (34.06)                      | 147 (46.37)         | <0.001  | 106 (46.29)                     | 97 (42.36)          | 0.397   |
| 16681             | a-carbose                                                         | 10 (0.52)                        | 10 (2.91)           | <0.001  | 0 (0)                           | 0 (0)               | -       |
| 30009             | Miglitol                                                          | 0 (0)                            | 0 (0)               | -       | 0 (0)                           | 0 (0)               | -       |
| 593411            | Sitagliptin                                                       | 252 (13.04)                      | 57 (16.57)          | 0.079   | 42 (18.42)                      | 39 (17.1)           | 0.713   |
| 1100699           | Linagliptin                                                       | 39 (2.02)                        | 16 (4.65)           | <0.01   | 11 (4.82)                       | 10 (4.39)           | 0.823   |
| 1368001           | Alogliptin                                                        | 10 (0.52)                        | 10 (2.91)           | <0.001  | 10 (4.39)                       | 10 (4.39)           | >0.99   |
| 857974            | Saxagliptin                                                       | 19 (0.98)                        | 10 (2.91)           | <0.01   | 10 (4.39)                       | 10 (4.39)           | >0.99   |
| 73044             | Repaglinide                                                       | 10 (0.52)                        | 10 (2.91)           | <0.001  | 0 (0)                           | 0 (0)               | -       |
| 274332            | Nateglinide                                                       | 10 (0.52)                        | 10 (2.91)           | <0.001  | 10 (4.39)                       | 10 (4.39)           | >0.99   |
| 1545653           | Empagliflozin                                                     | 98 (5.07)                        | 43 (12.5)           | <0.001  | 34 (14.91)                      | 25 (10.96)          | 0.209   |
| 1373458           | Canagliflozin                                                     | 47 (2.43)                        | 22 (6.4)            | <0.001  | 10 (4.39)                       | 10 (4.39)           | >0.99   |
| 1488564           | Dapagliflozin                                                     | 39 (2.02)                        | 14 (4.07)           | 0.020   | 10 (4.39)                       | 10 (4.39)           | >0.99   |
| 1992672           | Ertugliflozin                                                     | 10 (0.52)                        | 10 (2.91)           | <0.001  | 10 (4.39)                       | 0 (0)               | <0.01   |
| 4821              | Glipizide                                                         | 224 (11.59)                      | 78 (22.67)          | <0.001  | 37 (16.23)                      | 44 (19.3)           | 0.391   |
| 25789             | Glimepiride                                                       | 172 (8.9)                        | 45 (13.08)          | 0.015   | 28 (12.28)                      | 25 (10.96)          | 0.661   |
| 4815              | Glyburide                                                         | 48 (2.48)                        | 16 (4.65)           | 0.025   | 13 (5.7)                        | 10 (4.39)           | 0.521   |
| 10633             | Tolazamide                                                        | 0 (0)                            | 0 (0)               | -       | 0 (0)                           | 0 (0)               | -       |
| 2404              | Chlorpropamide                                                    | 0 (0)                            | 0 (0)               | -       | 0 (0)                           | 0 (0)               | -       |

(Contd...)

**Supplementary Table 3 (Continued)**

| Characteristic ID | Characteristic Name                                                            | Before Propensity Score Matching |                     |         | After Propensity Score Matching |                     |         |
|-------------------|--------------------------------------------------------------------------------|----------------------------------|---------------------|---------|---------------------------------|---------------------|---------|
|                   |                                                                                | Metformin                        | Metformin + GLP1-RA | P-value | Metformin                       | Metformin + GLP1-RA | P-value |
| 10635             | Tolbutamide                                                                    | 0 (0)                            | 0 (0)               | -       | 0 (0)                           | 0 (0)               | -       |
| 33738             | Pioglitazone                                                                   | 75 (3.88)                        | 34 (9.88)           | <0.001  | 17 (7.46)                       | 15 (6.58)           | 0.714   |
| 84108             | Rosiglitazone                                                                  | 10 (0.52)                        | 10 (2.91)           | <0.001  | 10 (4.39)                       | 10 (4.39)           | >0.99   |
| 9044              | Alanine aminotransferase [Enzymatic activity/volume] in Serum, Plasma or Blood | 60.47±56.3                       | 63.71±46.53         | 0.384   | 54.07±43.04                     | 65.97±48.87         | 0.013   |
| 9045              | Albumin [Mass/volume] in Serum, Plasma or Blood                                | 4.07±0.51                        | 4.08±0.5            | 0.834   | 4.03±0.52                       | 4.09±0.48           | 0.286   |
| 9046              | Alkaline phosphatase [Enzymatic activity/volume] in Serum, Plasma or Blood     | 99.48±62.6                       | 97.2±39.23          | 0.576   | 97.84±46.64                     | 95.35±38.87         | 0.579   |
| 16362-6           | Ammonia [Moles/volume] in Plasma                                               | 38.45±28.71                      | 42.4±20.33          | 0.689   | 38.94±14.73                     | 41.71±20.83         | 0.735   |
| 9047              | Aspartate aminotransferase [Enzymatic activity/volume] in Serum or Plasma      | 50.6±44.95                       | 56.05±42.22         | 0.074   | 45.94±27.94                     | 56.57±43.82         | <0.01   |
| 9048              | Bilirubin. direct [Mass/volume] in Serum or Plasma                             | 0.22±0.36                        | 0.21±0.2            | 0.764   | 0.26±0.66                       | 0.22±0.23           | 0.618   |
| 9049              | Bilirubin. indirect [Mass/volume] in Serum or Plasma                           | 0.54±0.39                        | 0.73±1.43           | 0.088   | 0.52±0.33                       | 0.79±1.59           | 0.310   |
| 9050              | Bilirubin. total [Mass/volume] in Serum, Plasma or Blood                       | 0.66±0.64                        | 0.6±0.48            | 0.144   | 0.59±0.43                       | 0.63±0.54           | 0.495   |
| 9083              | BMI                                                                            | 35.02±6.55                       | 37.37±5.99          | <0.001  | 34.11±7.36                      | 36.85±6.06          | <0.01   |
| 9081              | Body weight                                                                    | 218.64±58.45                     | 231.93±64.74        | <0.01   | 223.68±60.35                    | 226.02±62.96        | 0.736   |
| 9022              | Calcium [Mass/volume] in Serum, Plasma or Blood                                | 9.4±0.68                         | 9.48±0.54           | 0.058   | 9.43±0.92                       | 9.48±0.55           | 0.480   |
| 9024              | Creatinine [Mass/volume] in Serum, Plasma or Blood                             | 0.83±0.31                        | 0.82±0.33           | 0.860   | 0.8±0.29                        | 0.82±0.34           | 0.454   |
| 9051              | Gamma glutamyl transferase [Enzymatic activity/volume] in Serum or Plasma      | 109.43±154.43                    | 136.32±267.56       | 0.266   | 104.95±105.36                   | 109.18±100.82       | 0.854   |
| 9025              | Glucose [Mass/volume] in Serum, Plasma or Blood                                | 149±64.98                        | 165.53±77.65        | <0.001  | 147.01±69.08                    | 162.79±72.17        | 0.032   |
| 9037              | Hemoglobin A1c/Hemoglobin.total in Blood                                       | 7.1±1.55                         | 7.74±1.84           | <0.001  | 7.11±1.72                       | 7.69±1.79           | <0.01   |
| 9032              | INR in Plasma or Blood                                                         | 1.21±2.37                        | 1.07±0.17           | 0.381   | 1.12±0.4                        | 1.06±0.19           | 0.119   |
| 9020              | Platelets [# /volume] in Blood                                                 | 213.85±80.74                     | 221.76±77.01        | 0.148   | 220.56±88.04                    | 219.91±74.34        | 0.940   |
| 9030              | Urea nitrogen [Mass/volume] in Serum, Plasma or Blood                          | 13.8±6.57                        | 14.3±5.68           | 0.271   | 14.04±5.72                      | 14.03±5.31          | 0.974   |

Characteristics ID defines baseline characteristics based on ICD-10 for diagnoses, RxNorm for medications, and CPT for procedures

BMI, body mass index; ALT, alanine aminotransferase; AST, aspartate aminotransferase; GLP1-RA, glucagon-like peptide-1 receptor agonist; INR, international normalized ratio; HbA1c, hemoglobin A1c; T2DM, type 2 diabetes mellitus

**Supplementary Table 4** Cohort baseline FIB-4 scores

|                      | Before PS-matching characteristics |                     | After PS-matching characteristics |                     |
|----------------------|------------------------------------|---------------------|-----------------------------------|---------------------|
|                      | Metformin                          | Metformin + GLP1-RA | Metformin                         | Metformin + GLP1-RA |
|                      | FIB-4                              | FIB-4               | FIB-4                             | FIB-4               |
| All                  | 1.79                               | 1.54                | 1.56                              | 1.64                |
| Demographic Subgroup |                                    |                     |                                   |                     |
| Men                  | 2.32                               | 1.99                | 2.15                              | 1.86                |
| Women                | 1.64                               | 1.42                | 1.46                              | 1.44                |
| White                | 1.90                               | 1.66                | 1.61                              | 1.58                |
| Non-White            | 1.79                               | 1.25                | 1.49                              | 1.30                |
| Hispanic             | 1.61                               | 1.43                | 1.53                              | 1.45                |
| Non-Hispanic         | 1.73                               | 1.54                | 1.56                              | 1.57                |
| Age 35-59            | 1.32                               | 1.17                | 1.39                              | 1.18                |
| Age 60-85            | 2.16                               | 2.09                | 2.20                              | 2.11                |
| NASH                 | 1.78                               | 1.73                | 1.54                              | 1.72                |

FIB-4 scores were calculated for each cohort based on average lab values reported by TriNetX. T2DM Cirrhosis patients treated with Metformin and GLP1-RA were further divided into demographic subgroups. T2DM NASH cirrhosis patients treated with metformin and GLP1-RA were propensity score-matched to the NASH cirrhosis metformin (n=1,841) group.

*FIB-4, Fibrosis-4; GLP1-RA, glucagon-like peptide-1 receptor agonist; NASH, nonalcoholic steatohepatitis; T2DM, type 2 diabetes mellitus*

**Supplementary Table 5** Cohort baseline MELD-Na scores

|                      | Before PS-matching characteristics |                     | After PS-matching characteristics |                     |
|----------------------|------------------------------------|---------------------|-----------------------------------|---------------------|
|                      | Metformin                          | Metformin + GLP1-RA | Metformin                         | Metformin + GLP1-RA |
|                      | MELD-Na                            | MELD-Na             | MELD-Na                           | MELD-Na             |
| All                  | 6.43                               | 5.08                | 5.28                              | 5.17                |
| Demographic subgroup |                                    |                     |                                   |                     |
| Men                  | 9.15                               | 8.18                | 8.92                              | 7.55                |
| Women                | 4.39                               | 3.42                | 4.35                              | 3.49                |
| White                | 7.10                               | 5.39                | 6.84                              | 5.01                |
| Non-White            | 6.73                               | 4.63                | 4.95                              | 4.87                |
| Hispanic             | 5.22                               | 5.20                | 2.92                              | 2.90                |
| Non-Hispanic         | 6.18                               | 5.18                | 6.67                              | 5.40                |
| Age 35-59            | 6.22                               | 3.58                | 5.11                              | 3.26                |
| Age 60-85            | 6.55                               | 6.68                | 6.29                              | 6.69                |
| NASH                 | 5.19                               | 3.36                | 3.56                              | 3.48                |

MELD-Na scores were calculated for each cohort based on average lab values reported by TriNetX. T2DM Cirrhosis patients treated with Metformin and GLP1-RA were further divided into demographic subgroups. T2DM NASH cirrhosis patients treated with metformin and GLP1-RA were propensity score-matched to the NASH cirrhosis metformin (n=1,841) group

*GLP1-RA, glucagon-like peptide-1 receptor agonist; model for end-stage liver disease; NASH, nonalcoholic steatohepatitis; T2DM, type 2 diabetes mellitus*



**Supplementary Table 6** Study definitions

| Diagnosis                                                     | ICD-10 Code For Inclusion                                                                                                         |
|---------------------------------------------------------------|-----------------------------------------------------------------------------------------------------------------------------------|
| Type 2 diabetes                                               | E11                                                                                                                               |
| Cirrhosis                                                     | K70.3, K74, K74.6, K74.2                                                                                                          |
| Nonalcoholic steatohepatitis NASH                             | K76.0, K75.8                                                                                                                      |
| Ascites                                                       | R18, R18.8                                                                                                                        |
| Varices                                                       | I85, I85.0, I85.1, I86.4, I85.11                                                                                                  |
| Hepatic Encephalopathy                                        | G93.40, G93.41, G93.49, K72.91                                                                                                    |
| Diagnosis                                                     | ICD-10 Code For Exclusion                                                                                                         |
| Type 1 Diabetes                                               | E10                                                                                                                               |
| Primary and Secondary Biliary Cirrhosis and Hepatic Sclerosis | K74.3, K74.1, K74.4                                                                                                               |
| Viral Hepatitis                                               | B17.1, B18.2, B19.2, B16.0, B17.0, B18.0, B19.1, B17.9, B18.1, B19.9                                                              |
| End Stage Chronic Kidney Disease (Stage 4 & 5)                | N18.4, N18.5                                                                                                                      |
| Hepatocellular Carcinoma                                      | C22.0                                                                                                                             |
| Procedures                                                    | Current Procedural Terminology                                                                                                    |
| Transvenous intrahepatic portosystemic shunt (TIPS)           | 06180ZY, 37183                                                                                                                    |
| Liver Transplantation                                         | 47135                                                                                                                             |
| Medications                                                   | RxNorm                                                                                                                            |
| Metformin                                                     | 6809                                                                                                                              |
| GLP1-RA                                                       | 475968 liraglutide, 1534763 albiglutide, 60548 exenatide, 1991302 semaglutide, 1551291 dulaglutide                                |
| Demographics                                                  |                                                                                                                                   |
| Non-White                                                     | Non-White is defined as Black or African American, Asian, Native Hawaiian or Pacific Islander, Alaskan Native or American Indian. |
| Age                                                           | Defined as Age of Patients at the index of receiving mono or dual treatment                                                       |

Inclusion and exclusion criteria for patient cohort selection were based on ICD-10 coding, current procedural terminology and RxNorm terminology. For details review Materials and methods

**Supplementary Table 7** Cirrhosis cohort etiology

| Code   | Cirrhosis etiology                                | Before propensity score matching |                     |         | After propensity score matching |                     |         |
|--------|---------------------------------------------------|----------------------------------|---------------------|---------|---------------------------------|---------------------|---------|
|        |                                                   | Metformin                        | Metformin + GLP1-RA | P-value | Metformin                       | Metformin + GLP1-RA | P-value |
| K76.0  | Fatty (change of) liver, not elsewhere classified | 4937 (24.62)                     | 782 (54.97)         | <0.001  | 697 (52.95)                     | 663 (50.36)         | 0.172   |
| K75.8  | Other specified inflammatory liver diseases       | 1717 (8.56)                      | 437 (30.75)         | <0.001  | 338 (25.72)                     | 330 (25.07)         | 0.695   |
| K70.3  | Alcoholic cirrhosis of liver                      | 1099 (5.48)                      | 73 (5.16)           | 0.583   | 60 (4.54)                       | 69 (5.26)           | 0.379   |
| B18.2  | Chronic viral hepatitis C                         | 2805 (13.99)                     | 163 (11.43)         | <0.01   | 154 (11.67)                     | 152 (11.53)         | 0.906   |
| B18.1  | Chronic viral hepatitis B without delta-agent     | 461 (2.3)                        | 28 (1.99)           | 0.420   | 25 (1.87)                       | 27 (2.02)           | 0.783   |
| B18.0  | Chronic viral hepatitis B with delta-agent        | 22 (0.11)                        | 9 (0.62)            | <0.001  | 9 (0.72)                        | 0 (0)               | <0.01   |
| K74.6  | Other and unspecified cirrhosis of liver          | 5103 (25.45)                     | 718 ((50.5)         | <0.001  | 574 (43.59)                     | 590 (44.81)         | 0.516   |
| K75.4  | Autoimmune hepatitis                              | 176 (0.88)                       | 21 (1.49)           | 0.014   | 27 (2.02)                       | 19 (1.44)           | 0.244   |
| E83.11 | Hemochromatosis                                   | 199 (0.99)                       | 21 (1.49)           | 0.054   | 17 (1.3)                        | 19 (1.44)           | 0.744   |
| E88.01 | Alpha-1-antitrypsin deficiency                    | 32 (0.16)                        | 9 (0.62)            | <0.001  | 9 (0.72)                        | 9 (0.72)            | >0.99   |

Baseline diagnoses of T2DM (E11) patients with cirrhosis (K70.3, K74, K74.6, K74.2) on metformin (n=20,053) or metformin and GLP1-RA (n=1,316) before and after propensity score matching. NASH cirrhosis is defined by patients with both ICD-10 codes K76.0 and K75.8 concurrently. Values are n (%)

GLP1-RA, glucagon-like peptide-1 receptor agonist; NASH, nonalcoholic steatohepatitis; T2DM, type 2 diabetes mellitus

**Supplementary Table 8** Before and after propensity score matching, mortality outcomes for T2DM cirrhosis and T2DM patients with NASH cirrhosis

| 5-year survival rate        | Kaplan-Meier estimates           |                     |         |                  |                                 |                     |         |                  |
|-----------------------------|----------------------------------|---------------------|---------|------------------|---------------------------------|---------------------|---------|------------------|
|                             | Before propensity score matching |                     |         |                  | After propensity score matching |                     |         |                  |
|                             | Metformin                        | Metformin + GLP1-RA | P-value | HR (95%CI)       | Metformin                       | Metformin + GLP1-RA | P-value | HR (95%CI)       |
| All                         | 86.19                            | 88.59               | 0.001   | 0.61 (0.45-0.82) | 85.29                           | 88.53               | 0.011   | 0.61 (0.42-0.89) |
| <b>Demographic Subgroup</b> |                                  |                     |         |                  |                                 |                     |         |                  |
| Men                         | 79.52                            | 88.13               | 0.004   | 0.55 (0.36-0.83) | 77.76                           | 86.34               | 0.046   | 0.55 (0.3-0.97)  |
| Women                       | 89.11                            | 91.42               | 0.014   | 0.56 (0.36-0.9)  | 85.97                           | 91.28               | 0.012   | 0.5 (0.29-0.87)  |
| White                       | 81.96                            | 91.36               | <0.0001 | 0.39 (0.27-0.57) | 86.96                           | 88.99               | 0.014   | 0.55 (0.33-0.89) |
| Non-White                   | 91.10                            | 68.88               | 0.557   | 1.2 (0.64-2.27)  | 88.82                           | 69.26               | 0.839   | 0.91 (0.35-2.33) |
| Hispanic                    | 91.42                            | 97.50               | 0.325   | 0.5 (0.12-2.04)  | 96.34                           | 96.26               | 0.939   | 1.08 (0.15-7.69) |
| Non-Hispanic                | 87.42                            | 86.82               | 0.034   | 0.67 (0.46-0.97) | 88.09                           | 86.57               | 0.278   | 0.77 (0.48-1.23) |
| Age 35-59                   | 92.26                            | 91.61               | 0.174   | 0.66 (0.36-1.2)  | 95.96                           | 91.56               | 0.639   | 0.82 (0.36-1.89) |
| Age 60-85                   | 85.82                            | 84.74               | 0.176   | 0.78 (0.53-1.12) | 83.35                           | 84.64               | 0.114   | 0.68 (0.42-1.1)  |
| NASH                        | 92.50                            | 96.75               | 0.002   | 0.15 (0.04-0.62) | 90.92                           | 96.56               | 0.002   | 0.13 (0.03-0.58) |

K-M probability values are percent free of death. P values indicate P log-rank test. T2DM patients with cirrhosis treated with metformin and GLP1-RA were further divided into demographic subgroups. They were propensity score-matched to the metformin group by sex, race, ethnicity, and age groups. T2DM NASH cirrhosis patients treated with metformin and GLP1-RA were propensity score matched to the NASH cirrhosis metformin (n=1841) group

T2DM, type 2 diabetes mellitus; GLP1-RA, glucagon-like peptide-1 receptor agonist; NASH, nonalcoholic steatohepatitis; HR, hazard ratio; CI, confidence interval; K-M, Kaplan-Meier

**Supplementary Table 9** Before and after propensity score matching, composite hepatic decompensation outcomes for T2DM cirrhosis and T2DM patients with NASH cirrhosis

| Kaplan-Meier estimates                   |                                  |                     |         |                  |                                 |                     |         |                  |
|------------------------------------------|----------------------------------|---------------------|---------|------------------|---------------------------------|---------------------|---------|------------------|
| 5-year absence of hepatic decompensation | Before propensity score matching |                     |         |                  | After propensity score matching |                     |         |                  |
|                                          | Metformin                        | Metformin + GLP1-RA | P-value | HR (95%CI)       | Metformin                       | Metformin + GLP1-RA | P-value | HR (95%CI)       |
| All                                      | 86.68                            | 87.77               | 0.044   | 0.75 (0.56-0.99) | 82.01                           | 87.87               | 0.020   | 0.65 (0.46-0.93) |
| <b>Demographic Subgroup</b>              |                                  |                     |         |                  |                                 |                     |         |                  |
| Men                                      | 87.55                            | 89.35               | 0.463   | 0.85 (0.54-1.32) | 87.56                           | 92.42               | 0.438   | 0.75 (0.36-1.56) |
| Women                                    | 89.21                            | 90.08               | 0.055   | 0.65 (0.42-1.01) | 88.60                           | 90.23               | 0.021   | 0.54 (0.31-0.92) |
| White                                    | 88.72                            | 91.54               | 0.033   | 0.66 (0.44-0.97) | 88.65                           | 92.54               | 0.021   | 0.51 (0.29-0.92) |
| Non-White                                | 88.65                            | 89.62               | 0.715   | 0.88 (0.45-1.72) | 85.60                           | 90.10               | 0.067   | 0.44 (0.18-1.09) |
| Hispanic                                 | 90.58                            | 97.61               | 0.451   | 0.65 (0.2-2.04)  | 88.22                           | 97.83               | 0.428   | 0.51 (0.09-2.78) |
| Non-Hispanic                             | 87.62                            | 89.37               | 0.130   | 0.76 (0.53-1.09) | 87.07                           | 90.00               | 0.006   | 0.52 (0.32-0.83) |
| Age 35-59                                | 90.12                            | 90.64               | 0.859   | 0.96 (0.6-1.52)  | 92.87                           | 90.69               | 0.455   | 1.3 (0.65-2.63)  |
| Age 60-85                                | 85.12                            | 84.19               | 0.157   | 0.76 (0.52-1.11) | 81.89                           | 84.77               | 0.005   | 0.51 (0.32-0.83) |
| NASH                                     | 92.09                            | 94.83               | 0.054   | 0.48 (0.22-1.03) | 93.18                           | 95.58               | 0.072   | 0.36 (0.11-1.15) |

K-M probabilities values are percent free of decompensation. P values indicate P Log-rank Test. T2DM cirrhosis patients treated with metformin and GLP1-RA were further divided into demographic subgroups and were propensity score matched to the metformin group by sex, race, ethnicity, and age groups. T2DM NASH cirrhosis patients treated with metformin and GLP1-RA were propensity score matched to the NASH cirrhosis metformin (n=1,841) group. Composite hepatic decompensation is defined as any instance of ascites, variceal bleeding, or hepatic encephalopathy

T2DM, type 2 diabetes mellitus; GLP1-RA, glucagon-like peptide-1 receptor agonist; NASH, nonalcoholic steatohepatitis; HR, hazard ratio; CI, confidence interval; K-M, Kaplan-Meier

**Supplementary Table 10** Before and after propensity score matching, hepatocellular carcinoma outcomes for T2DM cirrhosis and T2DM patients with NASH cirrhosis

| Kaplan-Meier estimates                     |                                  |                     |         |                  |                                 |                     |         |                  |
|--------------------------------------------|----------------------------------|---------------------|---------|------------------|---------------------------------|---------------------|---------|------------------|
| 5-year absence of hepatocellular carcinoma | Before propensity score matching |                     |         |                  | After propensity score matching |                     |         |                  |
|                                            | Metformin                        | Metformin + GLP1-RA | P-value | HR (95%CI)       | Metformin                       | Metformin + GLP1-RA | P-value | HR (95%CI)       |
| All                                        | 93.43                            | 95.01               | 0.239   | 0.76 (0.49-1.19) | 91.15                           | 94.94               | 0.001   | 0.44 (0.26-0.74) |
| <b>Demographic Subgroup</b>                |                                  |                     |         |                  |                                 |                     |         |                  |
| Men                                        | 94.66                            | 98.60               | 0.167   | 0.5 (0.19-1.35)  | 96.67                           | 99.04               | 0.262   | 0.47 (0.12-1.82) |
| Women                                      | 92.06                            | 92.63               | 0.628   | 0.88 (0.53-1.45) | 87.05                           | 92.53               | 0.073   | 0.58 (0.32-1.06) |
| White                                      | 92.00                            | 95.20               | 0.411   | 0.8 (0.47-1.37)  | 90.63                           | 96.04               | 0.200   | 0.61 (0.28-1.32) |
| Non-White                                  | 94.34                            | 93.75               | 0.125   | 0.24 (0.03-1.72) | 97.52                           | 95.91               | 0.790   | 1.3 (0.18-9.09)  |
| Hispanic                                   | 94.00                            | 96.11               | 0.770   | 0.81 (0.2-3.33)  | 96.60                           | 96.67               | 0.665   | 0.59 (0.05-6.67) |
| Non-Hispanic                               | 92.54                            | 93.37               | 0.552   | 0.86 (0.53-1.41) | 87.93                           | 93.49               | 0.001   | 0.37 (0.21-0.67) |
| Age 35-59                                  | 90.71                            | 91.33               | 0.288   | 0.71 (0.38-1.33) | 89.31                           | 91.15               | 0.021   | 0.43 (0.21-0.88) |
| Age 60-85                                  | 95.36                            | 97.64               | 0.366   | 0.71 (0.33-1.49) | 91.65                           | 97.74               | 0.029   | 0.37 (0.15-0.93) |
| NASH                                       | 96.01                            | 97.48               | 0.823   | 0.91 (0.38-2.17) | 93.87                           | 97.93               | 0.457   | 0.62 (0.18-2.22) |

K-M probability values are percent free of hepatocellular carcinoma. P values indicate P log-rank test. T2DM cirrhosis patients treated with metformin and GLP1-RA were further divided into demographic subgroups and were propensity score matched to the metformin group by sex, race, ethnicity and age groups. T2DM NASH cirrhosis patients treated with metformin and GLP1-RA were propensity score matched to the NASH cirrhosis metformin (n=1,841) group

T2DM, type 2 diabetes mellitus; GLP1-RA, glucagon-like peptide-1 receptor agonist; NASH, nonalcoholic steatohepatitis; HR, hazard ratio; CI, confidence interval; K-M, Kaplan-Meier

**Supplementary Table 11** Six-month, 1-year, 2-year, 3-year and 5-year Kaplan-Meier estimates for mortality, hepatic decompensation and hepatocellular carcinoma in T2DM cirrhosis patients

| Cumulative outcome probabilities for T2DM patients with cirrhosis |                                  |                                    |         |                  |                                 |                                    |         |                  |
|-------------------------------------------------------------------|----------------------------------|------------------------------------|---------|------------------|---------------------------------|------------------------------------|---------|------------------|
| Outcome                                                           | Before propensity score matching |                                    |         |                  | After propensity score matching |                                    |         |                  |
|                                                                   | Metformin<br>(n=20,053)          | Metformin<br>+ GLP1 RA<br>(n=1422) | P-value | HR (95%CI)       | Metformin<br>(n=1316)           | Metformin<br>+ GLP1-RA<br>(n=1316) | P-value | HR (95%CI)       |
| <b>All-cause mortality</b>                                        |                                  |                                    |         |                  |                                 |                                    |         |                  |
| 6 months                                                          | 97.17                            | 98.82                              | <0.001  | 0.41 (0.24-0.69) | 98.01                           | 98.74                              | 0.154   | 0.62 (0.32-1.20) |
| 1 year                                                            | 95.80                            | 97.12                              | 0.011   | 0.61 (0.42-0.89) | 96.35                           | 97.09                              | 0.264   | 0.75 (0.46-1.23) |
| 2 years                                                           | 93.37                            | 95.48                              | <0.01   | 0.62 (0.44-0.86) | 93.67                           | 95.43                              | 0.113   | 0.71 (0.46-1.09) |
| 3 years                                                           | 91.20                            | 94.76                              | <0.001  | 0.58 (0.42-0.81) | 90.13                           | 94.70                              | <0.01   | 0.59 (0.4-0.88)  |
| 5 years                                                           | 86.19                            | 88.59                              | <0.01   | 0.61 (0.45-0.82) | 85.29                           | 88.53                              | 0.011   | 0.61 (0.42-0.89) |
| <b>Hepatic decompensation</b>                                     |                                  |                                    |         |                  |                                 |                                    |         |                  |
| 6 Months                                                          | 97.32                            | 98.51                              | 0.014   | 0.55 (0.34-0.89) | 97.14                           | 98.41                              | 0.048   | 0.56 (0.31-1.01) |
| 1 year                                                            | 95.93                            | 97.34                              | 0.015   | 0.62 (0.58-0.92) | 95.93                           | 97.20                              | 0.081   | 0.65 (0.4-1.06)  |
| 2 years                                                           | 93.60                            | 95.78                              | 0.012   | 0.65 (0.46-0.91) | 92.57                           | 95.61                              | 0.029   | 0.63 (0.41-0.95) |
| 3 years                                                           | 91.36                            | 94.45                              | <0.01   | 0.64 (0.47-0.88) | 89.68                           | 94.56                              | <0.01   | 0.59 (0.4-0.75)  |
| 5 years                                                           | 86.68                            | 87.77                              | 0.044   | 0.75 (0.56-0.99) | 82.01                           | 87.87                              | 0.020   | 0.65 (0.46-0.93) |
| <b>Hepatocellular carcinoma</b>                                   |                                  |                                    |         |                  |                                 |                                    |         |                  |
| 6 Months                                                          | 99.22                            | 99.40                              | 0.602   | 0.82 (0.38-1.75) | 98.51                           | 99.36                              | 0.076   | 0.46 (0.19-1.11) |
| 1 year                                                            | 98.65                            | 99.28                              | 0.167   | 0.61 (0.33-1.23) | 97.13                           | 99.23                              | <0.01   | 0.38 (0.21-0.69) |
| 2 years                                                           | 97.54                            | 97.89                              | 0.398   | 0.8 (0.48-1.33)  | 92.92                           | 97.82                              | <0.001  | 0.39 (0.24-0.67) |
| 3 years                                                           | 95.96                            | 97.12                              | 0.199   | 0.73 (0.45-1.18) | 91.15                           | 97.05                              | <0.001  | 0.44 (0.26-0.74) |
| 5 years                                                           | 93.43                            | 95.01                              | 0.239   | 0.76 (0.49-1.19) | 97.13                           | 94.94                              | <0.01   | 0.46 (0.19-1.11) |

K-M probabilities values are percent free of death, decompensation, and hepatocellular carcinoma. P values indicate P log-rank test

T2DM, type 2 diabetes mellitus; GLP1-RA, glucagon-like peptide-1 receptor agonist; HR, hazard ratio; CI, confidence interval; K-M, Kaplan-Meier

**Supplementary Table 12** Six-month, 1-year, 2-year, 3-year and 5-year Kaplan-Meier estimates for mortality, hepatic decompensation and hepatocellular carcinoma in T2DM patients with NASH cirrhosis

| Outcome                         | Before propensity score matching |                                   |         |                  | After propensity score matching |                                   |         |                  |
|---------------------------------|----------------------------------|-----------------------------------|---------|------------------|---------------------------------|-----------------------------------|---------|------------------|
|                                 | Metformin<br>(n=1841)            | Metformin<br>+ GLP1-RA<br>(n=317) | P-value | HR (95%CI)       | Metformin<br>(n=229)            | Metformin<br>+ GLP1-RA<br>(n=229) | P-value | HR (95%CI)       |
| <b>All-cause mortality</b>      |                                  |                                   |         |                  |                                 |                                   |         |                  |
| 6 Months                        | 98.79                            | 100                               | 0.055   | -                | 99.11                           | 100                               | 0.156   | -                |
| 1 year                          | 98.18                            | 100                               | 0.022   | -                | 97.05                           | 100                               | 0.012   | -                |
| 2 years                         | 96.24                            | 100                               | <0.01   | -                | 96.27                           | 100                               | <0.01   | -                |
| 3 years                         | 95.48                            | 100                               | <0.01   | -                | 96.27                           | 100                               | <0.01   | -                |
| 5 years                         | 92.50                            | 96.75                             | <0.01   | 0.15 (0.04-0.62) | 90.92                           | 96.56                             | <0.01   | 0.13 (0.03-0.58) |
| <b>Hepatic decompensation</b>   |                                  |                                   |         |                  |                                 |                                   |         |                  |
| 6 Months                        | 98.03                            | 99.31                             | 0.121   | 0.34 (0.08-1.43) | 98.62                           | 99.52                             | 0.312   | 0.33 (0.03-3.12) |
| 1 year                          | 97.33                            | 98.94                             | 0.102   | 0.39 (0.12-1.27) | 98.62                           | 99.52                             | 0.312   | 0.33 (0.03-3.12) |
| 2 years                         | 95.74                            | 98.45                             | 0.042   | 0.36 (0.13-1.01) | 98.02                           | 99.52                             | 0.166   | 0.24 (0.03-2.13) |
| 3 years                         | 94.79                            | 97.77                             | 0.042   | 0.4 (0.16-1)     | 98.02                           | 98.74                             | 0.358   | 0.46 (0.08-2.56) |
| 5 years                         | 92.09                            | 94.83                             | 0.054   | 0.48 (0.22-1.03) | 93.18                           | 95.58                             | 0.072   | 0.36 (0.11-1.15) |
| <b>Hepatocellular carcinoma</b> |                                  |                                   |         |                  |                                 |                                   |         |                  |
| 6 Months                        | 99.47                            | 99.32                             | 0.776   | 1.25 (0.27-5.88) | 99.53                           | 99.08                             | 0.578   | 1.96 (0.18-20)   |
| 1 year                          | 99.04                            | 98.53                             | 0.481   | 1.47 (0.49-4.55) | 99.53                           | 97.93                             | 0.337   | 2.86 (0.3-25)    |
| 2 years                         | 98.56                            | 97.48                             | 0.283   | 1.64 (0.66-4)    | 99.53                           | 97.93                             | 0.207   | 3.7 (0.42-33.33) |
| 3 years                         | 96.97                            | 97.48                             | 0.997   | 1 (0.42-2.38)    | 98.60                           | 97.93                             | 0.486   | 1.82 (0.33-10)   |
| 5 years                         | 96.01                            | 97.48                             | 0.823   | 0.91 (0.38-2.17) | 93.87                           | 97.93                             | 0.457   | 0.62 (0.18-2.22) |

K-M probabilities values are percent free of death, decompensation, and hepatocellular carcinoma. P values indicate P log-rank test

T2DM, type 2 diabetes mellitus; GLP1-RA, glucagon-like peptide-1 receptor agonist; NASH, nonalcoholic steatohepatitis; HR, hazard ratio; CI, confidence interval; K-M, Kaplan-Meier
